# Supplementary material for: ETS1 Suppresses Tumorigenesis of Human Breast Cancer via Trans-Activation of Canonical Tumor Suppressor Genes
Source: Front Oncol. 2020 May 14;10:642. doi: 10.3389/fonc.2020.00642 (PMC7239993; doi:10.3389/fonc.2020.00642)
Supplement: Supplementary file 2 [file Table_2.XLSX]

## Sheet: Table S2. ChIP primer
		Sequence(5'-3')
ADAMTS9_ChIP	F	TGTGGCCCAGGATACAAACTG
	R	GACCTCAGCGACTCCTAAAGTC
NOTCH1_ChIP	F	GCCTGGGACTACTTCTCGT
	R	CATGCAAATTTCAGTCGCCA
TXNIP_ChIP	F	AGCGATCTCACTGATTGGTC
	R	TAGTTTCAAGCAGGAGGCGG
STAT5A_ChIP	F	CTTTGTGGTGGGAAATCACCC
	R	GGGAAGAGGTGACTGTAGTCG
