# Supplementary material for: ETS1 Suppresses Tumorigenesis of Human Breast Cancer via Trans-Activation of Canonical Tumor Suppressor Genes
Source: Front Oncol. 2020 May 14;10:642. doi: 10.3389/fonc.2020.00642 (PMC7239993; doi:10.3389/fonc.2020.00642)
Supplement: Supplementary file 4 [file Table_4.XLSX]

## Sheet: Table S4. DEGs in RNA-seq
Gene	WT	ΔCRE	log2(fold_change)	test_stat	p_value
IGFN1	0.594376	12.8304	4.43204	7.55892	5e-05
MUC1	1.49326	0.420081	-1.82972	-1.17158	5e-05
SRGN	62.4245	171.508	1.4581	3.08544	5e-05
GRAMD1B	0.590321	0	-inf	-nan	5e-05
NELL2	2.73062	0.224143	-3.60673	-3.99955	5e-05
NEO1	3.44743	0.137637	-4.64659	-5.60571	5e-05
CDH11	13.4051	1.14525	-3.54905	-5.36759	5e-05
IL1B	166.956	49.9775	-1.74012	-3.66727	5e-05
CST1	34.9734	3.17581	-3.46106	-4.72097	5e-05
TMEM42	77.7849	4.79379	-4.02025	-6.60485	5e-05
ADAMTS9	3.41768	0.743501	-2.20061	-3.39279	5e-05
EREG	30.9366	91.5792	1.5657	3.25629	5e-05
PLAT	44.5821	11.8564	-1.9108	-3.80582	5e-05
TGIF2LX	0.653778	0	-inf	-nan	5e-05
CHRDL1	2.53902	0	-inf	-nan	5e-05
DIO2	0.159812	0.827047	2.3716	2.71011	0.0002
MMP13	11.5146	3.08713	-1.89912	-3.09019	0.00025
COL27A1	4.28937	1.42554	-1.58925	-2.61049	0.00025
ADAM8	12.9989	4.95925	-1.39019	-2.55698	0.0004
LOC201651	0.761111	5.69232	2.90284	3.08161	0.0004
ARHGAP27	9.03774	2.02891	-2.15526	-2.87176	0.00045
C1QTNF6	1.96002	0.386398	-2.34271	-2.56156	0.0006
MMP14	64.5951	29.7469	-1.11869	-2.38149	0.00095
GMFG	58.3834	20.5215	-1.50843	-2.55002	0.00095
FSTL1	23.7883	10.9638	-1.1175	-2.21711	0.00105
TMEM71	4.22518	0.828442	-2.35054	-2.84289	0.00105
GLUL	5.70685	1.96169	-1.5406	-2.53026	0.00115
TUSC3	22.6355	10.7087	-1.07981	-2.24965	0.0012
NRP2	1.80241	0.469294	-1.94137	-2.36104	0.00125
ETS1	142.212	62.4956	-1.18622	-2.35314	0.0013
G0S2	349.084	163.84	-1.09128	-2.31602	0.00135
PLCB2	2.50011	0.742832	-1.75088	-2.46146	0.00135
SUSD2	25.516	11.8813	-1.10272	-2.23951	0.0016
ENG	20.1653	9.04293	-1.15701	-2.30369	0.0016
SDR42E1	1.15328	0.142371	-3.01802	-2.93995	0.00175
COL7A1	5.30791	11.291	1.08896	2.04915	0.00185
SCARF1	2.66742	0.695639	-1.93903	-2.38947	0.0019
LMO2	1.00232	0.12915	-2.95623	-2.09469	0.00205
KIAA0040	2.02377	0.652018	-1.63406	-2.2545	0.0021
CSGALNACT1	2.36376	0.6734	-1.81155	-2.22847	0.00235
FAM46C	1.38477	0.439086	-1.65707	-2.16645	0.0024
OAS1	5.28552	1.35855	-1.95998	-2.41668	0.0024
MYO1D	0.761646	0.132016	-2.52841	-2.6728	0.0024
COL12A1	3.77535	1.56692	-1.26868	-2.19675	0.0027
APOL3	1.44629	0.389825	-1.89146	-1.88754	0.0029
STAT5A	14.3933	6.76583	-1.08906	-2.16231	0.00305
IFIT3	15.8121	6.98514	-1.17866	-2.14633	0.00325
RHPN1	4.8843	1.97418	-1.3069	-2.07756	0.00325
ITGB4	17.2843	8.72512	-0.986213	-2.05792	0.0033
CCDC88C	3.22405	1.28054	-1.33212	-2.23351	0.00335
TMEM173	32.0921	15.2212	-1.07613	-2.1354	0.00385
KIAA1199	11.9194	6.07513	-0.972323	-2.00091	0.0039
FZD8	3.969	1.46304	-1.43981	-2.09804	0.0044
OASL	5.5623	1.94577	-1.51534	-2.09836	0.00445
F3	102.071	195.884	0.940427	1.94615	0.0045
RAPGEF3	1.67336	0.602776	-1.47305	-2.05539	0.00455
TEKT4P2	4.73956	1.43453	-1.72417	-2.09546	0.00455
CYP2J2	6.23232	2.19916	-1.50281	-2.11622	0.00465
SIGIRR	1.75899	0.428571	-2.03714	-2.09004	0.0047
BCL2A1	35.3334	14.8772	-1.24793	-2.08511	0.0047
NAV1	1.28201	0.481434	-1.41299	-2.21145	0.00475
KCNS3	8.37086	3.34269	-1.32437	-2.11768	0.00495
EGR1	17.4059	34.0204	0.966825	2.01273	0.00495
EFNB2	5.93423	12.0201	1.01832	1.98346	0.00505
L3MBTL4	1.95899	0.668352	-1.55143	-2.01076	0.0053
TIMP3	25.2656	48.5348	0.941848	1.98472	0.00545
GPSM3,NOTCH4	32.4158	15.4583	-1.06832	-1.9902	0.0056
ZC4H2	1.49788	0.434305	-1.78614	-1.98903	0.0057
UCN2	13.4276	27.9037	1.05525	1.95949	0.0058
TMEM92	13.9998	6.63768	-1.07665	-1.97468	0.0063
DKK1	43.2301	82.4659	0.931762	1.98069	0.0064
PARM1	0.865049	0.23079	-1.9062	-2.13193	0.00645
CD33	1.08506	0.0994065	-3.44829	-1.50667	0.0066
CST4	11.8786	3.78481	-1.65007	-2.09028	0.00695
LOXL4	0.790191	0.207512	-1.929	-2.02374	0.00715
SERPINB9	1.90395	0.696168	-1.45149	-1.91202	0.0074
KCNAB2	5.59157	1.28961	-2.11632	-2.27918	0.00745
RGS16	2.52571	0.81852	-1.6256	-2.00563	0.0078
GSN	7.90249	3.66356	-1.10906	-1.85616	0.0082
KISS1	13.4923	4.96383	-1.44261	-1.90386	0.0085
TC2N	1.14481	0.407246	-1.49114	-1.81319	0.00885
LRRC33	6.64003	2.88163	-1.20431	-1.8797	0.0089
IFIT2	4.26874	1.87989	-1.18316	-1.82521	0.00905
NFATC2	5.34941	2.55764	-1.06457	-1.95889	0.0091
IFIT1	2.65194	0.987065	-1.42583	-1.99439	0.00985
GRK5	5.12725	2.12798	-1.2687	-1.87561	0.0099
FGD6	1.1887	0.498734	-1.25305	-1.82153	0.0103
MGLL	20.0537	10.681	-0.908818	-1.85189	0.01125
GBP2	20.4218	10.804	-0.918544	-1.79678	0.01135
LRRC20	3.93224	1.61423	-1.28451	-1.81788	0.012
LOC146880	9.43883	4.52398	-1.06101	-1.82138	0.01265
ABCG1	1.22618	0.459553	-1.41587	-1.67371	0.0128
EFNA1	11.6961	5.52232	-1.08268	-1.7367	0.0129
PHACTR1	1.87817	0.637147	-1.55963	-1.80955	0.01345
AQP3	4.44761	9.88454	1.15214	1.82298	0.0135
TMEM163	2.00594	0.609296	-1.71906	-1.89493	0.01355
CST2	5.63514	1.64004	-1.78072	-1.90756	0.01365
GPNMB	0.182164	0.704047	1.95044	1.77576	0.0142
ROBO4	2.13666	0.872037	-1.2929	-1.75256	0.01455
ARHGAP27	11.5859	6.22807	-0.895515	-1.70296	0.01495
PLEKHA6	1.43058	0.618375	-1.21004	-1.74677	0.01515
TNFRSF14	1.62561	0.458979	-1.82448	-1.87001	0.01535
ZNF736	0.893837	0.233491	-1.93665	-1.84796	0.0154
BNIP3	44.9147	25.0967	-0.839689	-1.69364	0.01575
SLC7A11	6.22947	10.8901	0.805831	1.69441	0.017
TNC	11.4941	6.52027	-0.817886	-1.70025	0.0175
HYAL1	0.197549	0.613792	1.63554	1.24395	0.01825
CALB2	1.31075	0.425848	-1.62198	-1.53641	0.01855
PIK3CG	1.59207	0.6717	-1.24502	-1.71258	0.01885
PARP10	6.07048	3.08409	-0.976966	-1.64986	0.01885
S1PR5	3.24266	1.34994	-1.26428	-1.66114	0.01925
FAM189A2	1.89434	0.69963	-1.43703	-1.64768	0.01965
SNORA8	13.4913	0	-inf	-nan	0.02005
PTH1R	0.856475	0.266528	-1.68412	-1.59698	0.02055
ZG16B	4.67479	1.70996	-1.45094	-1.6427	0.02115
LZTS2	15.9676	8.88228	-0.84614	-1.62102	0.0212
GDF15	16.1636	29.9241	0.888559	1.62628	0.0225
FRMD4A	2.04237	1.00005	-1.03016	-1.59551	0.02265
MARCH4	3.43847	1.65755	-1.05271	-1.65291	0.0227
SNCG	16.096	7.48907	-1.10384	-1.60607	0.02285
KAL1	0.590284	0.224526	-1.39453	-1.61955	0.0239
ZNF85	1.2641	0.442541	-1.51422	-1.54908	0.0241
FRMD4B	0.691029	0.25908	-1.41535	-1.64523	0.0241
AADAC	0.152498	2.24568	3.88029	2.19784	0.0243
ARRB2	4.39018	2.0098	-1.12723	-1.55649	0.02585
ASGR1	2.25975	0.835499	-1.43545	-1.58331	0.026
TMEM45B	0.792935	0.235965	-1.74863	-1.70318	0.02635
PTPRE	19.7323	11.7325	-0.750044	-1.59054	0.0271
SERPINA1	2.31418	1.06533	-1.11921	-1.49654	0.02715
EGFL7	17.4449	9.22298	-0.919496	-1.548	0.02715
CDC42EP2	55.4272	33.3397	-0.733352	-1.54787	0.0281
DNMBP	25.0866	15.3429	-0.709349	-1.50187	0.02815
OAS3	6.14167	3.46269	-0.826738	-1.56547	0.0285
AFAP1L2	1.64482	0.70404	-1.2242	-1.56121	0.0305
ID4	1.02334	2.25042	1.13692	1.559	0.03115
SLPI	0.718608	2.70989	1.91496	1.62579	0.03145
RRAD	4.46454	1.89611	-1.23547	-1.54559	0.0318
IFITM2	82.8735	48.9253	-0.760332	-1.48295	0.03315
ITGA5	47.6521	29.5629	-0.688751	-1.47254	0.0336
KIAA1462	2.6693	4.60137	0.785601	1.50745	0.03375
TXNIP	2.58527	1.19284	-1.11592	-1.49956	0.03505
FAM43A	1.78117	0.73578	-1.27548	-1.57362	0.03545
NPDC1	24.1083	13.8815	-0.796368	-1.47679	0.0358
ABLIM1	10.5489	6.41259	-0.718111	-1.47485	0.0363
F2RL1	97.9575	161.079	0.71754	1.47897	0.03635
TGFBR2	28.7501	17.6263	-0.705839	-1.47894	0.0368
NOTCH1	7.51219	4.57437	-0.71566	-1.45347	0.0372
ARHGDIB	266.183	164.581	-0.693622	-1.46949	0.0375
CARD16	2.41002	0.713792	-1.75547	-1.54408	0.0379
GSTM1	4.93335	9.94516	1.01143	1.46264	0.038
KSR1	0.613059	0.253993	-1.27124	-1.41939	0.03805
PLEKHG5,TNFRSF25	0.815328	0.379852	-1.10194	-0.885649	0.0385
SPDEF	0.988254	0.3606	-1.45448	-1.47068	0.03865
GALNT6	2.26976	1.07801	-1.07417	-1.49084	0.0387
UNC13A	0.622538	0.297172	-1.06687	-1.39212	0.03915
LOC100292680	0.157847	0.585671	1.89156	1.6473	0.0396
SOD2	236.216	143.357	-0.720497	-1.4665	0.03965
RNU12	6.7635	0	-inf	-nan	0.0402
VTRNA1-3	405.619	0	-inf	-nan	0.0402
MDFI	1.06247	0.354291	-1.58442	-1.53331	0.04075
AFAP1L1	6.6656	3.81035	-0.806812	-1.45528	0.0411
LOC643723	0.547958	1.49743	1.45035	1.47924	0.04135
ANXA10	0.214675	0.882715	2.03979	1.6764	0.04235
DPYSL2	13.6841	8.27386	-0.725873	-1.42962	0.0426
HR	0.403486	0.922755	1.19343	1.46661	0.04265
GADD45A	19.5602	33.0485	0.756665	1.44335	0.0433
XYLT2	9.49138	5.53334	-0.778466	-1.44424	0.0433
ST3GAL1	14.8943	9.42019	-0.660931	-1.40841	0.04365
ARHGAP31	9.8038	6.04102	-0.698547	-1.43986	0.04375
PNMA2	4.94868	2.81269	-0.815093	-1.42875	0.04425
DNAAF3	3.97097	1.99306	-0.994508	-1.36766	0.04445
C11orf95	10.342	6.32364	-0.709687	-1.42758	0.0452
ADORA1	0.621523	0.220279	-1.49648	-1.39266	0.04675
CHRNB1	7.75571	4.25277	-0.866858	-1.42635	0.04695
DOCK4	2.7217	1.52818	-0.832695	-1.43102	0.04715
RFTN1	31.0468	19.675	-0.658078	-1.38093	0.0474
FAM115C	0.594516	0.237604	-1.32315	-1.30251	0.0474
KLRC2	3.47867	1.50489	-1.20888	-1.42976	0.04815
CNTNAP1	3.51926	1.98906	-0.823188	-1.38448	0.0484
LOC100130238	1.72475	3.24388	0.911338	1.36857	0.04915
